# Supplementary material for: Identification of Dietary Patterns Associated with Incidence of Hyperglycemia in Middle-Aged and Older Korean Adults
Source: MDPI journal article supplement (doi:10.3390/nu11081801), 2019-08-04
Supplement: s1 [file s1]

## Identification of Dietary Patterns Associated with Incidence of Type 2 Diabetes in Middle-Aged and Older Korean Adults

**Authors:** Kyung Won Lee, PhD, Hae Dong Woo, PhD, Mi Jin Cho, MS, Jae Kyung Park, MS, Sung Soo Kim, PhD\*

Supplementary Table S1. Distribution of factor scores across quintiles of each dietary pattern in the middle-aged Korean adults, the KoGES-HEXA study

|                                                  | Men                                   |                |                 | Women                                 |                |                 |
|--------------------------------------------------|---------------------------------------|----------------|-----------------|---------------------------------------|----------------|-----------------|
|                                                  | Quintile (Q) of dietary pattern score |                |                 | Quintile (Q) of dietary pattern score |                |                 |
|                                                  | Q1<br>(lowest)                        | Q3             | Q5<br>(highest) | Q1<br>(lowest)                        | Q3             | Q5<br>(highest) |
| “Prudent” pattern                                |                                       |                |                 |                                       |                |                 |
| Median                                           | -0.91                                 | -0.20          | 1.11            | -0.93                                 | -0.20          | 1.09            |
| Range                                            | -3.24 to -0.71                        | -0.37 to -0.01 | 0.54 to 21.16   | -5.60 to -0.71                        | -0.37 to 0.00  | 0.55 to 19.32   |
| “Fatty fish, meat, and flour-based food” pattern |                                       |                |                 |                                       |                |                 |
| Median                                           | -0.80                                 | -0.23          | 1.04            | -0.74                                 | -0.23          | 0.95            |
| Range                                            | -3.66 to -0.64                        | -0.37 to -0.06 | 0.45 to 27.88   | -3.53 to -0.59                        | -0.36 to -0.07 | 0.42 to 24.57   |
| “Coffee and sweets” pattern                      |                                       |                |                 |                                       |                |                 |
| Median                                           | -1.16                                 | -0.14          | 1.68            | -1.03                                 | -0.17          | 1.17            |
| Range                                            | -4.55 to -1.01                        | -0.39 to 0.22  | 0.74 to 6.25    | -7.78 to -0.91                        | -0.48 to 0.12  | 0.78 to 8.46    |
| “Whole grain (men)/white rice (women)” pattern   |                                       |                |                 |                                       |                |                 |
| Median                                           | -1.63                                 | 0.31           | 0.97            | -0.75                                 | -0.36          | 1.91            |
| Range                                            | -8.49 to -1.17                        | 0.18 to 0.42   | 0.71 to 5.52    | -9.36 to -0.64                        | -0.50 to -0.16 | 0.29 to 4.60    |
